# Supplementary material for: Dealumination-controlled strategy mediates Ti–Y zeolite with cooperative active sites for selective oxidations
Source: Royal Society of Chemistry journal article supplement (doi:10.1039/d2cy00808d), 2022-01-01
Supplement: d2cy00808d1.pdf [file d2cy00808d1.pdf]

**Dealumination-controlled strategy mediates Ti-Y zeolite with  
cooperative active sites for selective oxidations**

Haoyi Lin, Jiaying Zhang, Qingxu Duan, Kaixuan Yang, Weiping Liao,\* Shixue Qi,\*

Hongying Lü and Zhiguo Zhu\*

College of Chemistry and Chemical Engineering, Yantai University, 30 Qingquan  
Road, Yantai 264005, Shandong, China

E-mail address: liaowp@ytu.edu.cn (W. Liao); Qishixue@ytu.edu.cn (S. Qi);  
zhuzg@ytu.edu.cn (Z. Zhu)

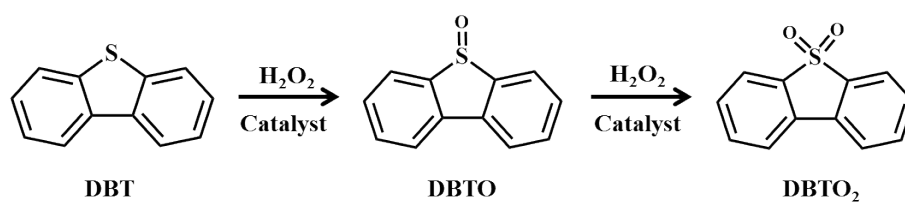

**Scheme S1.** Reaction pathways of DBT oxidation with H<sub>2</sub>O<sub>2</sub>.

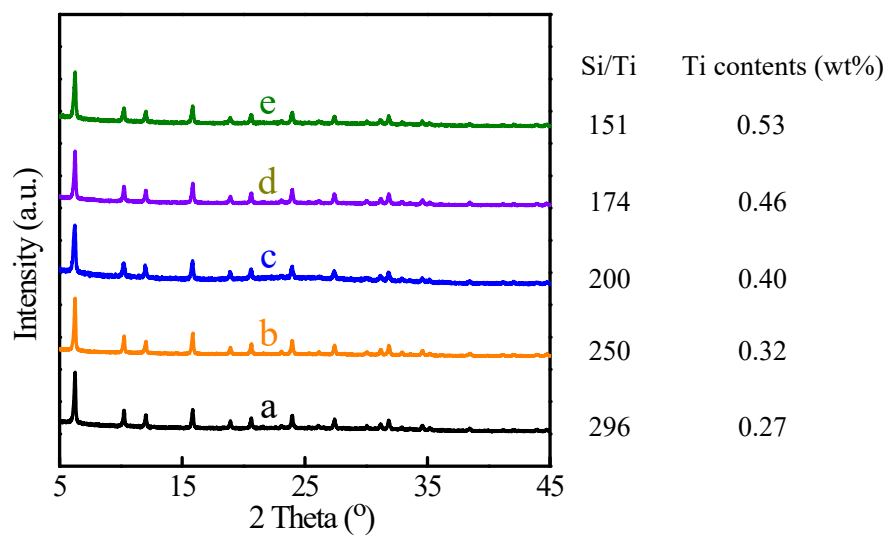

**Fig. S1** XRD patterns, Si/Ti molar ratio and Ti contents of Ti-Y-12-200 (a), Ti-Y-12-150 (b), Ti-Y-12-100 (c), Ti-Y-12-75 (d), and Ti-Y-12-50 (e) samples.

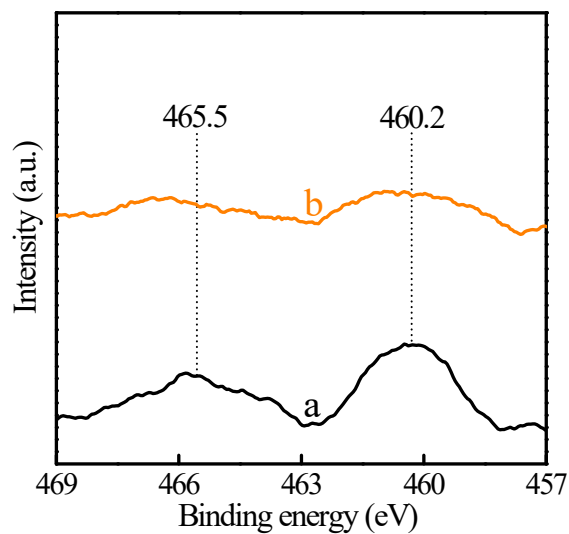

**Fig. S2** Ti 2p XPS spectra of Ti-Y-12-50 (a) and Ti-Y-12-200 (b) samples.

Two broad bands at about 460.2 and 465.5 eV, associated with 2p<sub>3/2</sub> and 2p<sub>1/2</sub> photoelectrons of isolated Ti ions in the zeolite framework,<sup>1,2</sup> were observed for Ti-Y-12-50 and Ti-Y-12-200 samples (Fig. S2).

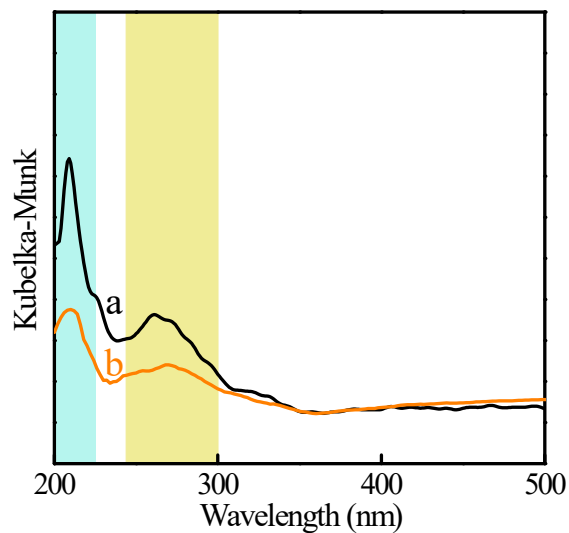

**Fig. S3** UV-Vis spectra of Ti-Y-12-50 (a) and Ti-Y-12-200 (b) samples.

As exhibited in Fig. S3, both Ti-Y-12-50 and Ti-Y-12-200 samples gave a sharp and intensive band at about 210 nm, attributed to tetrahedrally coordinated titanium,<sup>3</sup> in company with a broad shoulder signal in the region of 250–290 nm, associated with mononuclear octahedron titanium species.<sup>3,4</sup> Nearly no signals above 320 nm indicated the absence of titanium oxide like anatase.<sup>4</sup>

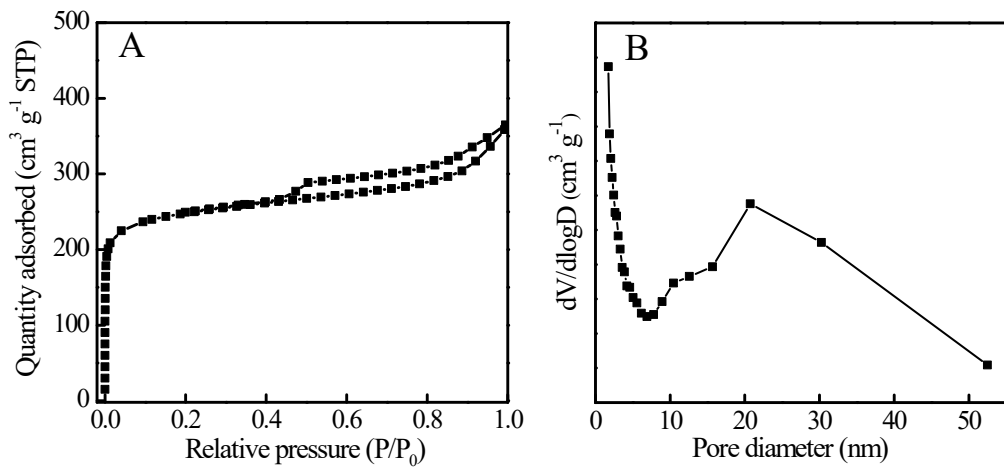

**Fig. S4** (A) N<sub>2</sub> adsorption-desorption isotherm and (B) pore size distribution of Ti-Y-12-50 sample.

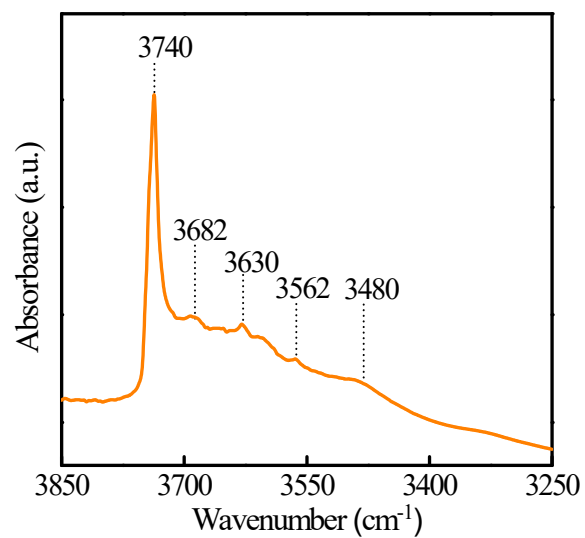

**Fig. S5** FT-IR spectra in the hydroxyl vibration region of Y-AT-12 sample.

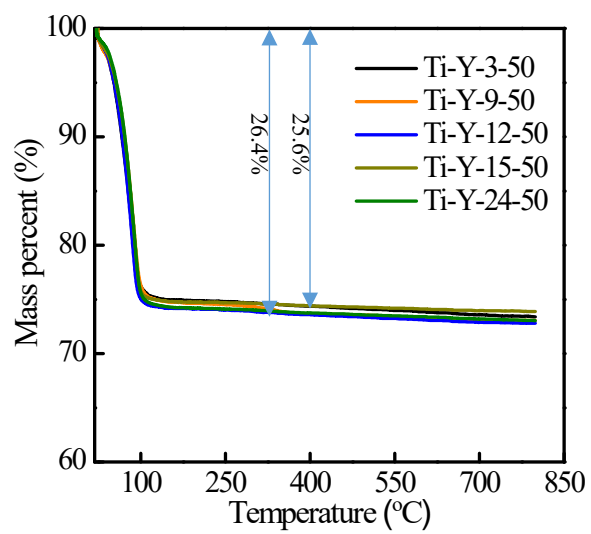

**Fig. S6** TG curves of various samples saturated with water for two days.



## References

- 1 V. Smeets, C. Boissière, C. Sanchez, E. M. Gaigneaux, E. Peeters, B. F. Sels, M. Dusselier and D. P. Debecker, *Chem. Mater.*, 2019, **31**, 1610–1619.
- 2 Z. Zhu, H. Xu, B. Wang, J. Yin, J. Jiang, H. Lü and P. Wu, *Chem. Commun.*, 2019, **55**, 14279–14282.
- 3 L. Wu, X. Deng, S. Zhao, H. Yin, Z. Zhuo, X. Fang, Y. Liu and M. He, *Chem. Commun.*, 2016, **52**, 8679–8682.
- 4 Q. Guo, K. Sun, Z. Feng, G. Li, M. Guo, F. Fan and C. Li, *Chem. -Eur. J.*, 2012, **18**, 13854–13860.
